# Supplementary material for: Coral-like hierarchical carbon nanoarchitectures loaded with Rh- and Co-porphyrins as high-efficiency electrodes: effect of pore morphology on CO oxidation and oxygen reduction performance
Source: Royal Society of Chemistry journal article supplement (doi:10.1039/c8ta05897k), 2018-01-01
Supplement: c8ta05897k1.pdf [file c8ta05897k1.pdf]

# *Supplementary Information*

submitted to *Journal of Materials Chemistry A*

## **Coral-Like Hierarchical Carbon Nanoarchitectures Loaded with Rh- and Co- Porphyrins as High-Efficiency Electrodes: Effect of Pore Morphology on CO Oxidation and Oxygen Reduction Performance**

*Shiori Kubo,<sup>a\*</sup> Akira Endo,<sup>a</sup> Shin-ichi Yamazaki<sup>b</sup>*

a. Research Institute for Chemical Process Technology, National Institute of Advanced Industrial Science and Technology (AIST), 1-1-1, Higashi, Tsukuba, 305-8561, Japan

b. Research Institute of Electrochemical Energy, AIST, 1-8-31, Midorigaoka, Ikeda, Osaka, 563-0026, Japan

## **Details of materials characterization and electrochemical measurement techniques**

### **Nitrogen sorption analysis:**

Nitrogen (N<sub>2</sub>) gas sorption analysis was carried out using Belsorp Max and Belsorp Max II systems (MicrotracBEL Corp.) at 77 K. Each sample was held under vacuum at 180 °C for 2 h and then outgassed to < 7 E-5 Pa prior to measurement. Brunauer-Emmett-Teller (BET), *t*-plot, and Barrett-Joyner-Halenda (BJH) calculations were performed using BelMasterTM version 6.1.0.8. BJH distributions were interpolated by B-Spline interpolation.

### **Method for calculating $V_{\text{meso-macro}}$ \*:**

$$V_{\text{meso-macro}}^* [\text{cm}^3 \text{g}^{-1}] = V_{\text{meso-macro}} [\text{cm}^3 \text{g}^{-1}] - V_{\text{cavitation}} [\text{cm}^3 \text{g}^{-1}] \quad (\text{S1})$$

$$V_{cavitation} = \frac{V_{des@0.5} [cm^3 g^{-1}] \times 10^{-3}}{C [L mol^{-1}]} \times \frac{M [g mol^{-1}]}{D [g cm^{-3}]}$$

,where

,where  $V_{des@0.5}$  is the  $V_{ads}^{N_2}@STP$  value at the  $P/P_0 = 0.5$  point of

the desorption curve of the  $N_2$  isotherms (*i.e.*, relative pressure at which the cavitation

event occurs)

, and where

$C$ : the ideal gas constant

$M$ : molecular weight of nitrogen molecule,

and

$D$ : density of liquid nitrogen.

Taking  $C = 22.4 [L mol^{-1}]$ ,  $M = 28 [g mol^{-1}]$ , and  $D = 0.808 [g cm^{-3}]$ ,  $V_{cavitation}$  is

calculated by:

$$V_{cavitation} = \frac{V_{des@0.5} [cm^3 g^{-1}] \times 10^{-3}}{22.4 [L mol^{-1}]} \times \frac{28 [g mol^{-1}]}{0.808 [g cm^{-3}]}$$

### **Electrochemical measurements:**

The generation of  $H_2O_2$  during oxygen reduction reaction (ORR) was measured using the modified RRDE and a bi-potentiostat (ALS electrochemical analyzer Model 711B). The potential of the ring Pt electrode was fixed at 1.1 V vs.  $Ag|AgCl|KCl(sat.)$ . This potential is high enough for the Pt ring electrode to oxidize  $H_2O_2$  electrochemically. The ratio of the  $H_2O_2$  generation ( $X_{H_2O_2}$ ) was calculated based on **equation S2**.

$$X_{H_2O_2} = \frac{2I_R/N}{I_D + I_R/N} \quad (S2)$$

, where  $I_R$ ,  $I_D$ , and  $N$  denote the ring current, disk current, and collection efficiency, respectively. The  $N$  value is the ratio of the ring current and disk current of a hydrodynamic voltammogram of  $[\text{Fe}(\text{CN})_6]^{3-}$  at 6400 rpm.

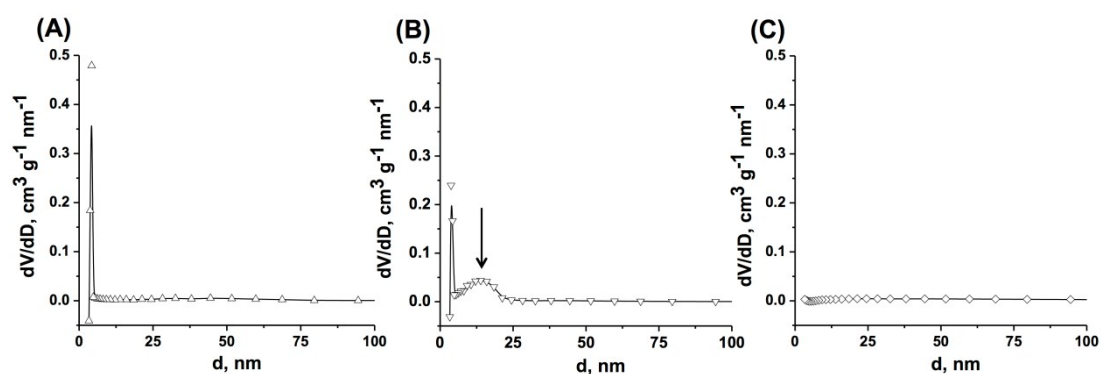

**Figure S1.** BJH pore size distributions of (A)  $C_{\text{micro-meso}_1}$ , (B)  $C_{\text{micro-meso}_2}$ , and (C)  $C_{\text{micro}_3}$  calculated from the desorption curve.

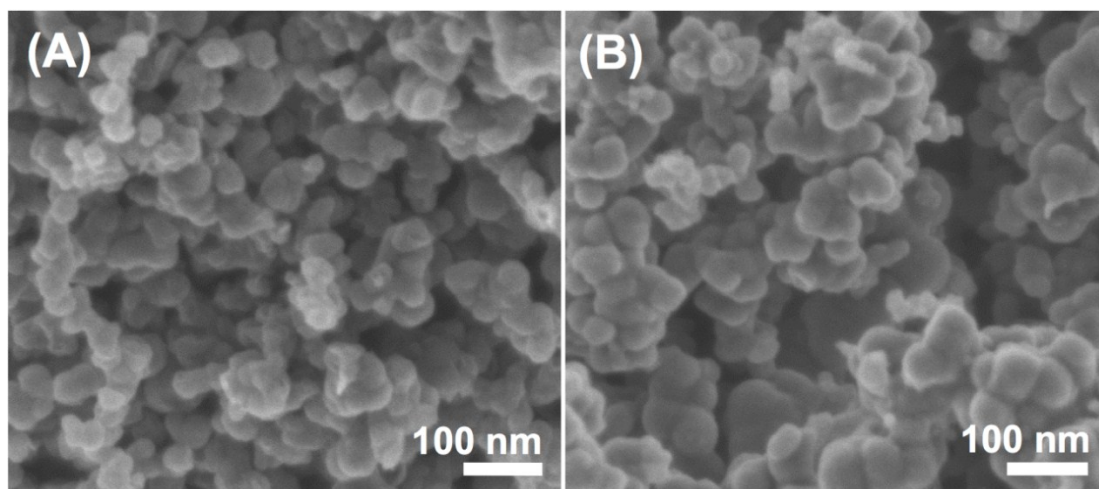

**Figure S2.** SEM micrographs of (A) Ketjenblack and (B) Vulcan XC 72R commercial carbon samples.

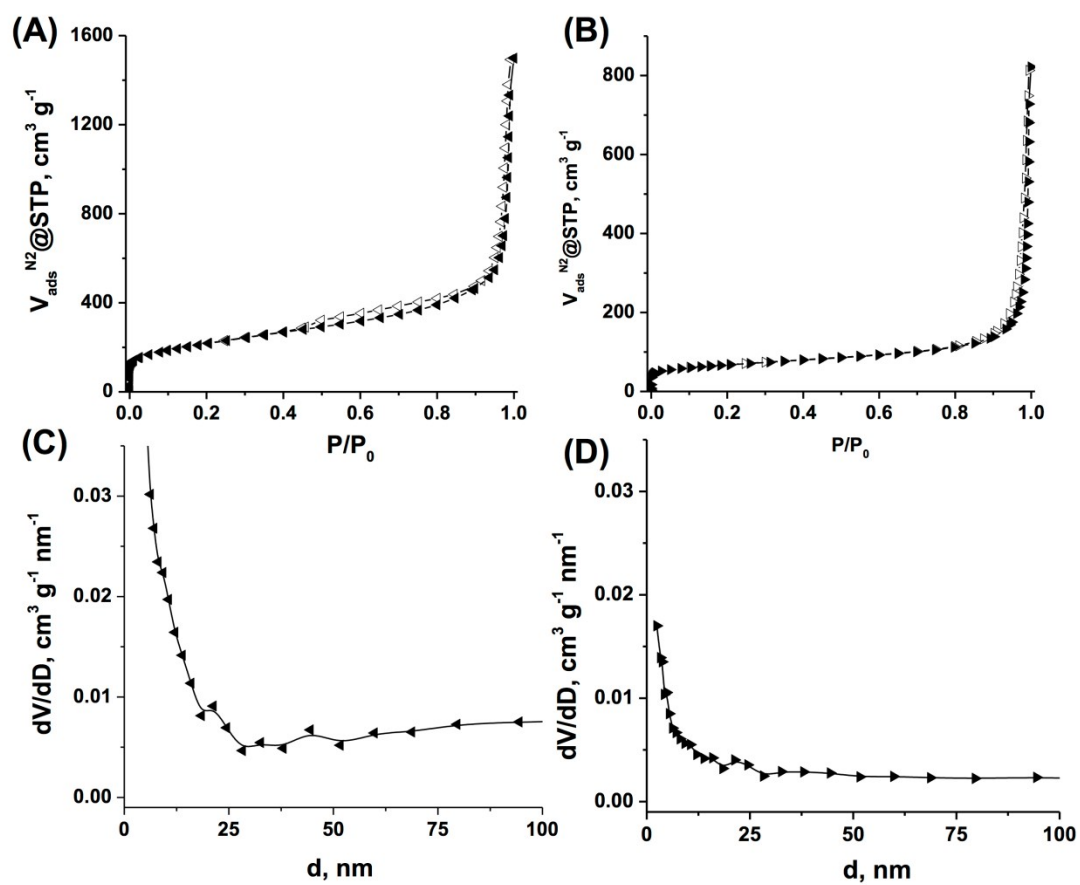

**Figure S3.**  $\text{N}_2$  sorption isotherms (upper stage) and BJH pore size distribution (lower stage) of (A,C) Ketjenblack and (B,D) Vulcan XC 72R.

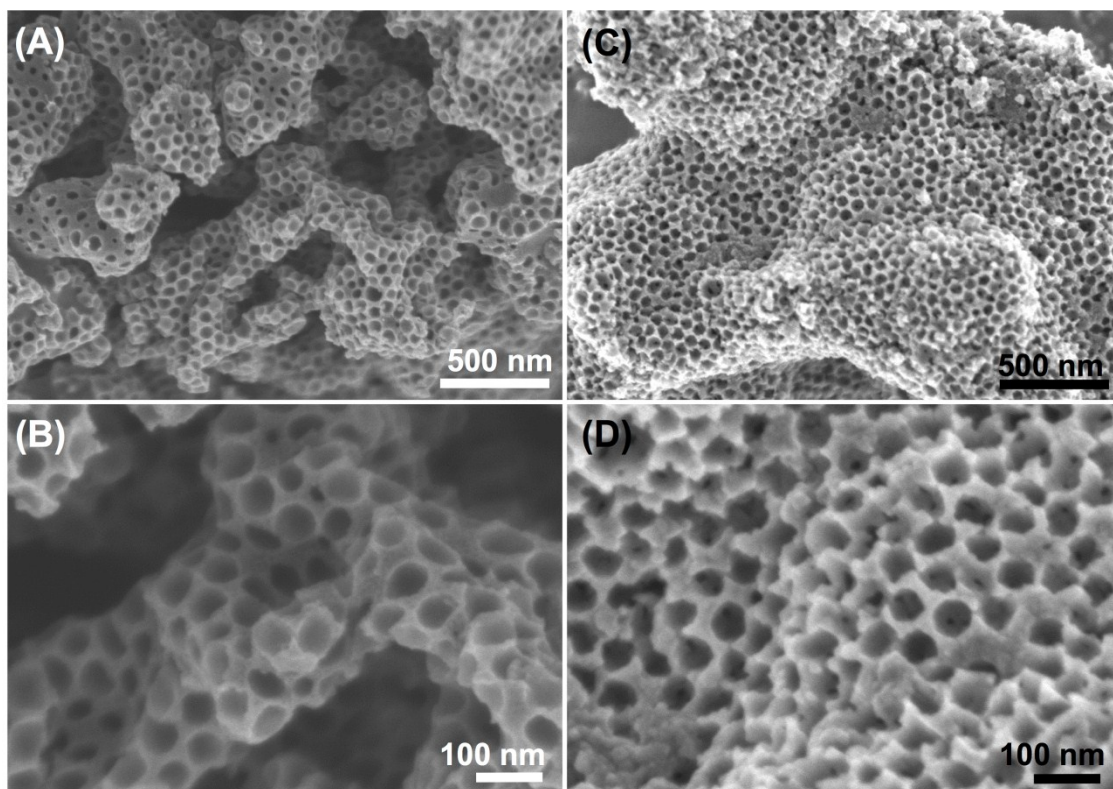

**Figure S4.** SEM micrograph of coral-like carbon supports pulverized with a spatula (A,B)  $C_{\text{micro-meso}_1}$  (C,D)  $C_{\text{micro-meso}_2}$ .

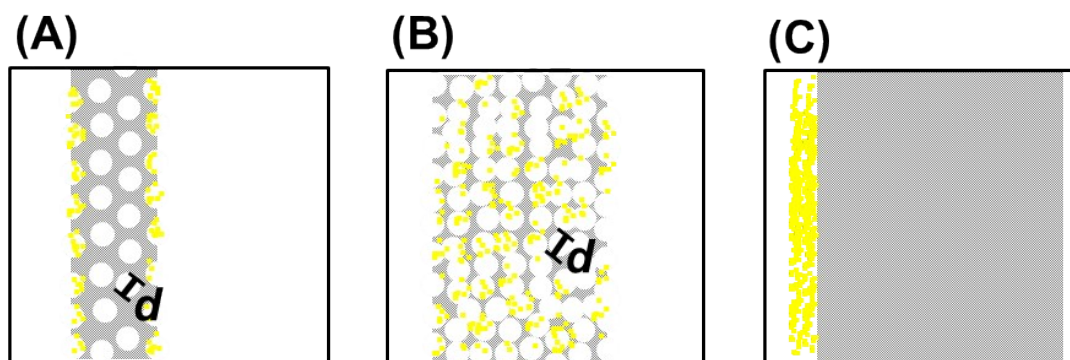

**Figure S5.** Adsorption model of porphyrin molecules in the spherical pores of (A)  $C_{\text{micro-meso}_1}$  and (B)  $C_{\text{micro-meso}_2}$  and (C) at particle surface of  $C_{\text{micro}_3}$ . The grey shading indicates the carbon wall (with  $< 2$  nm pores), while the white pores have a diameter ( $d$ ) of  $\sim 50$  nm. The yellow dots represent porphyrin molecules.

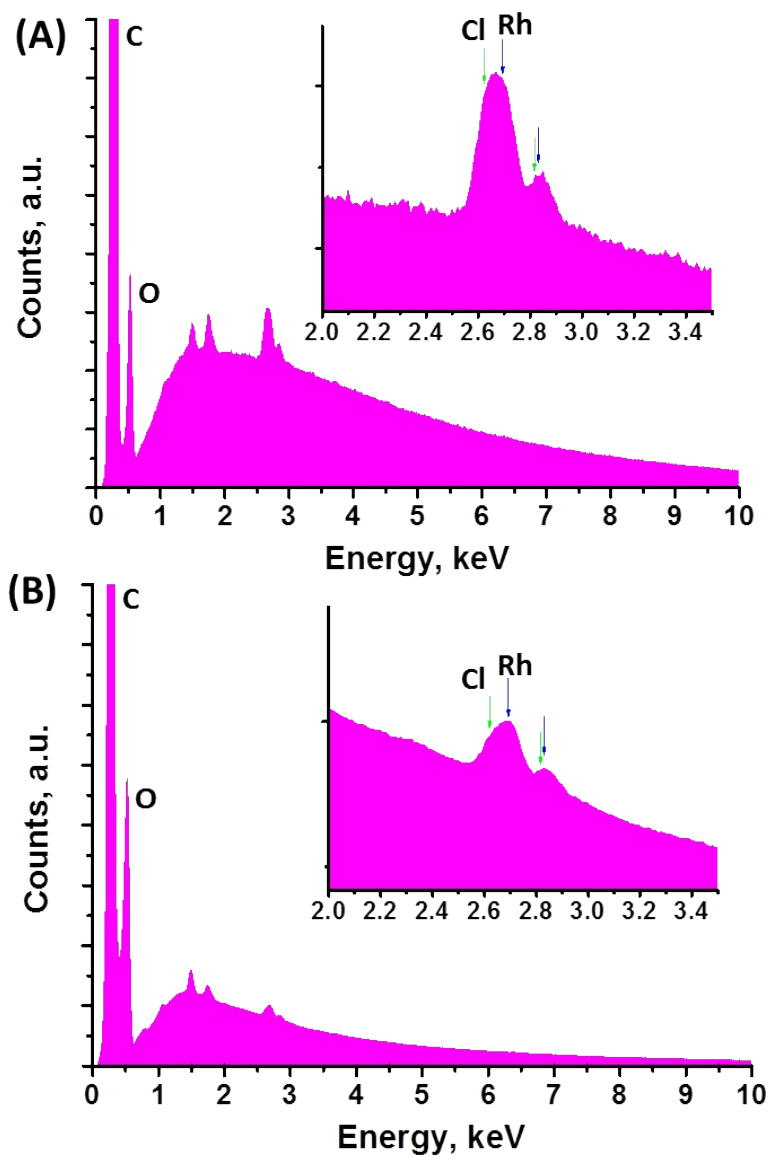

**Figure S6.** EDX spectra of Rh-TCPP-loaded (A)  $C_{\text{micro-meso\_1}}$  and (B)  $C_{\text{micro-meso\_2}}$ . Each insert represents the enlarged spectrum of the 2-3.5 keV region, while green and blue arrows represent the positions of the theoretically calculated energy of characteristic X-ray deriving from Cl ( $K\alpha$ ,  $K\beta$ ) and Rh ( $L\alpha$ ,  $L\beta$ ), respectively.

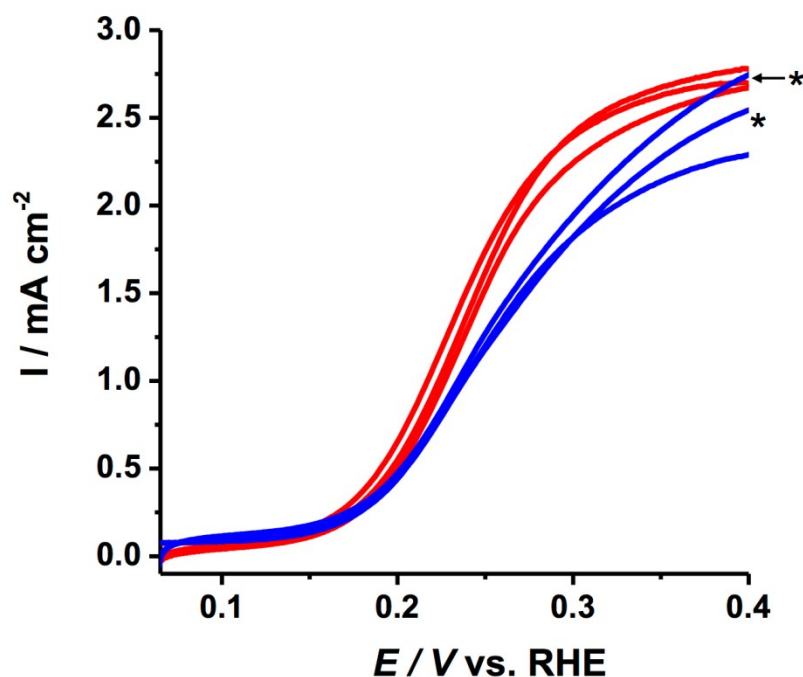

**Figure S7.** Linear sweep voltammograms of CO oxidation reaction by Rh-TCPP loaded on (blue lines)  $C_{\text{micro-meso}_1}$  and (red lines)  $C_{\text{micro-meso}_2}$  using the evaporation-to-dryness method. Each line corresponds to a voltammogram of the newly prepared modified electrode each time. Starred voltammograms correspond to those shown in Figure 6.

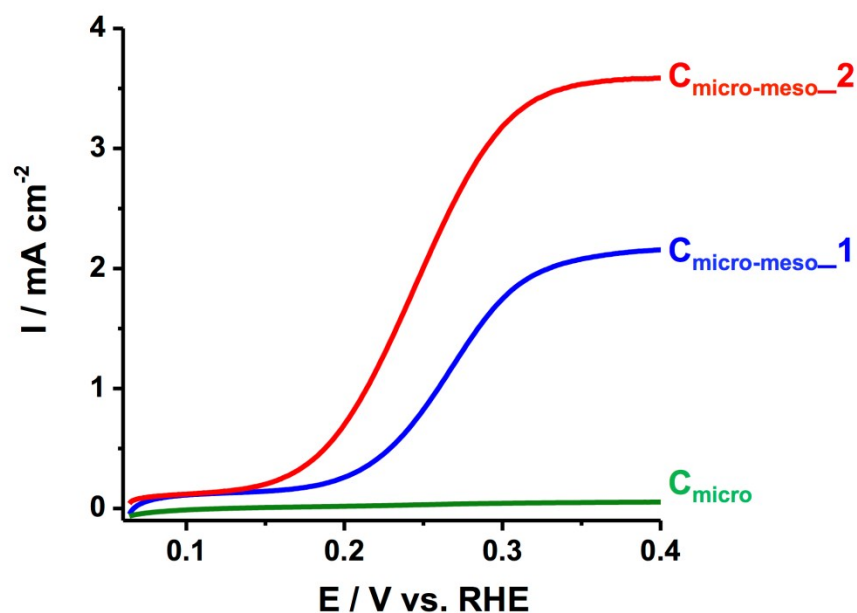

**Figure S8.** Linear sweep voltammograms for the electrochemical CO oxidation reaction by Rh-TCPP loaded on  $C_{\text{micro-meso}_1}$ ,  $C_{\text{micro-meso}_2}$ , and  $C_{\text{micro}_3}$  using the equilibrium adsorption method.

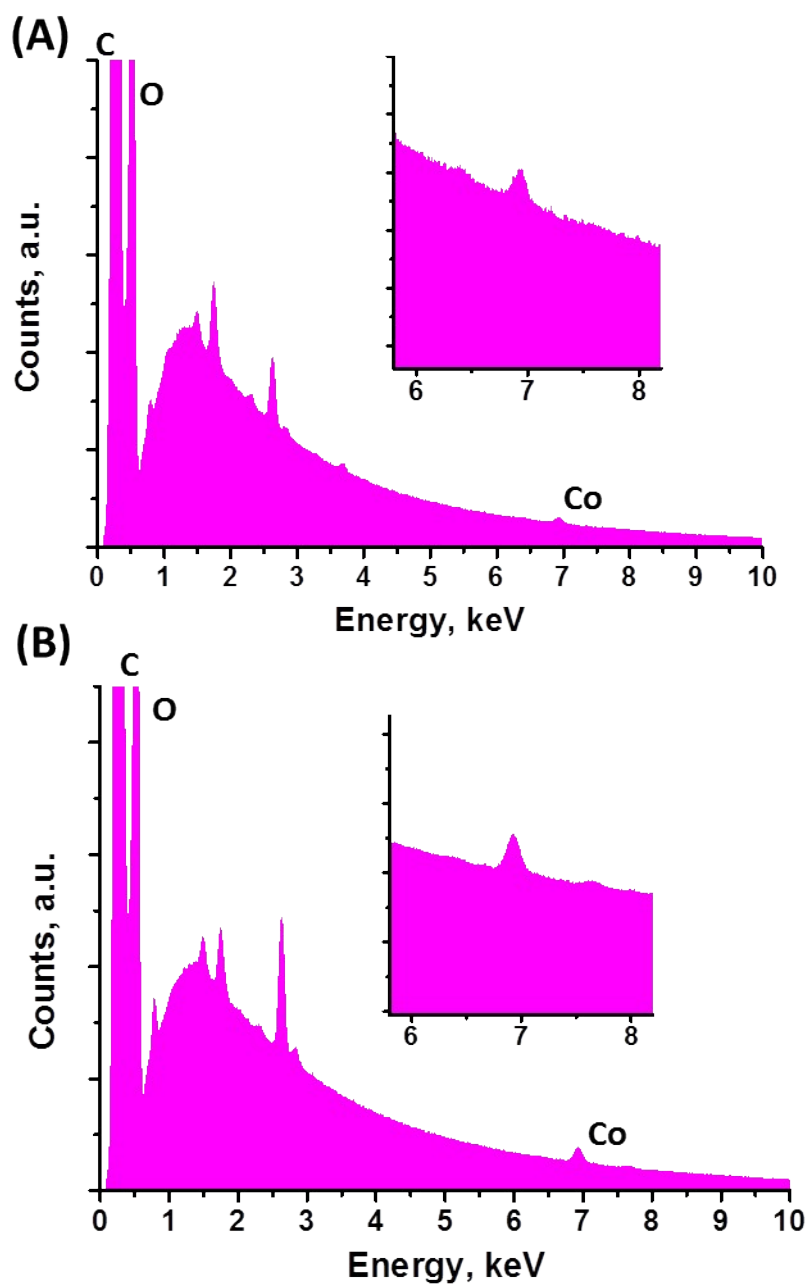

**Figure S9.** EDX spectra of Co-OEP-loaded (A)  $C_{\text{micro-meso}_1}$  and (B)  $C_{\text{micro-meso}_2}$ . Each insert represents the enlarged spectrum of the 6-8 keV region.



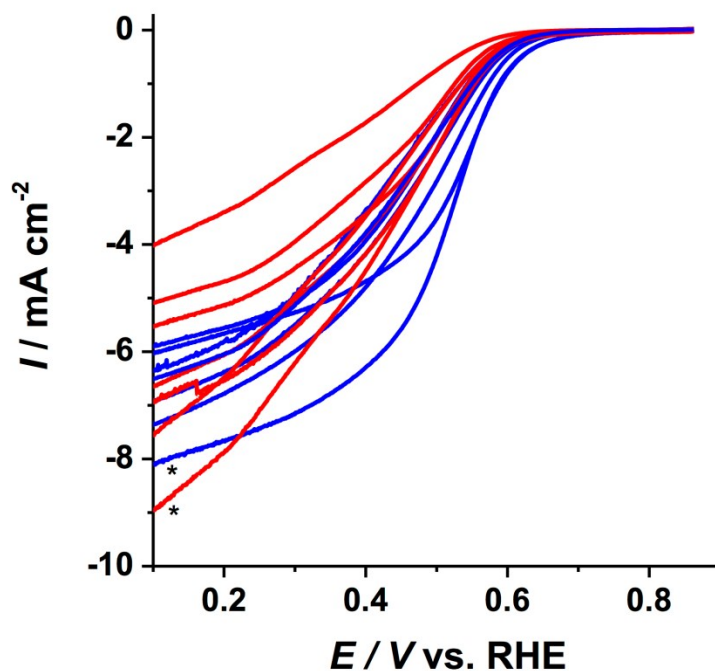

**Figure S10.** Linear sweep voltammograms of  $\text{O}_2$  reduction reaction by Co-OEP loaded on (blue lines)  $\text{C}_{\text{micro-meso}_1}$  and (red lines)  $\text{C}_{\text{micro-meso}_2}$  using the evaporation-to-dryness method. Each line corresponds to a voltammogram of the newly prepared modified electrode each time. Starred voltammograms correspond to those shown in Figure 7.

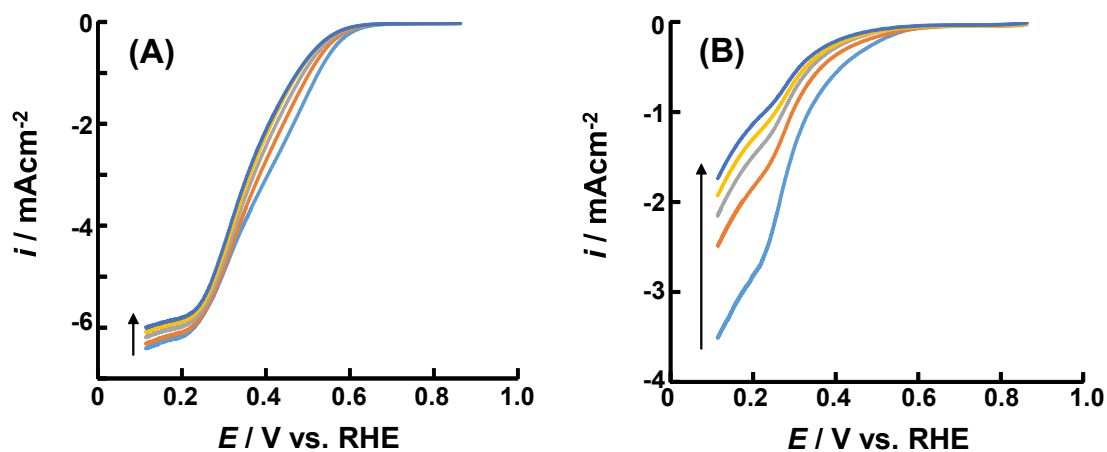

**Figure S11.** Repeated scans of linear sweep voltammograms of the electrochemical  $\text{O}_2$  reduction reaction by Co-OEP loaded on (A)  $\text{C}_{\text{micro-meso}_1}$  and (B) Ketjenblack.

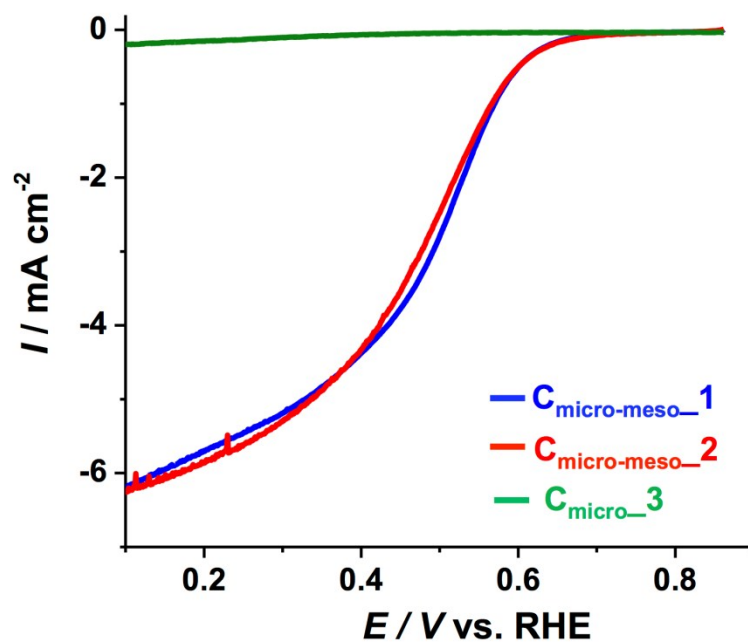

**Figure S12.** Linear sweep voltammograms of the electrochemical O<sub>2</sub> reduction reaction by Co-OEP loaded on  $C_{\text{micro-meso}_1}$ ,  $C_{\text{micro-meso}_2}$  and  $C_{\text{micro}_3}$  using the equilibrium adsorption method.
